# Supplementary material for: Lifestyle Practices, Satisfaction with Life and the Level of Perceived Stress of Polish and Foreign Medical Students Studying in Poland
Source: PubMed Central journal article supplement (PMC7345250; doi:10.3390/ijerph17124445), 2020-06-20
Supplement: ijerph-17-04445-s001.pdf [file ijerph-17-04445-s001.pdf]

Data for the article on: **Lifestyle practices, satisfaction with life and the level of perceived stress of Polish and foreign medical students studying in Poland**

|         |              | Global FLQ | SWLS    | PSS     |
|---------|--------------|------------|---------|---------|
| N       | Valid        | 444        | 444     | 444     |
|         | Missing data | 0          | 0       | 0       |
| M       |              | 34.8491    | 23.7928 | 21.5090 |
| Me      |              | 35.0000    | 25.0000 | 22.0000 |
| SD      |              | 6.60885    | 5.58273 | 5.16040 |
| Minimum |              | 5.00       | 5.00    | .00     |
| Maximum |              | 50.00      | 35.00   | 40.00   |

| _PL_foreigners |            | Global FLQ   | SWLS    | PSS     |         |
|----------------|------------|--------------|---------|---------|---------|
| Poland         | N          | Valid        | 213     | 213     | 213     |
|                |            | Missing data | 0       | 0       | 0       |
|                | M          |              | 36.2629 | 23.6854 | 22.7793 |
|                | Me         |              | 37.0000 | 24.0000 | 23.0000 |
|                | SD         |              | 6.20684 | 5.11653 | 3.87215 |
|                | Minimum    |              | 12.00   | 7.00    | 11.00   |
|                | Maximum    |              | 50.00   | 35.00   | 34.00   |
|                | Foreigners | N            | Valid   | 231     | 231     |
| Missing data   |            |              | 0       | 0       | 0       |
| M              |            | 33.5455      | 23.8918 | 20.3377 |         |
| Me             |            | 34.0000      | 25.0000 | 21.0000 |         |
| SD             |            | 6.71250      | 5.98995 | 5.88205 |         |
| Minimum        |            | 5.00         | 5.00    | .00     |         |
| Maximum        |            | 50.00        | 35.00   | 40.00   |         |

**TOTAL**

|                                               | M     | Me    | SD   | Min   | Max   |
|-----------------------------------------------|-------|-------|------|-------|-------|
| <b>Age</b>                                    | 21,89 | 21,00 | 3,98 | 17,00 | 50,00 |
| <b>Material situation</b>                     | 3,21  | 3,00  | 0,53 | 1,00  | 4,00  |
| <b>Self-Assessment of health condition</b>    | 3,85  | 4,00  | 0,75 | 1,00  | 5,00  |
| <b>Self-Assessment of style of life</b>       | 3,58  | 4,00  | 0,85 | 1,00  | 5,00  |
| <b>Students life has changed my lifestyle</b> | 3,32  | 3,00  | 0,73 | 1,00  | 4,00  |
| <b>Importance of to be healthy</b>            | 8,96  | 10,00 | 1,47 | 1,00  | 10,00 |

PL

|                                        |       |       |      |       |       |
|----------------------------------------|-------|-------|------|-------|-------|
| Age                                    | 22,10 | 21,00 | 4,46 | 19,00 | 50,00 |
| Material situation                     | 3,28  | 3,00  | 0,50 | 1,00  | 4,00  |
| Self-Assessment of health condition    | 4,03  | 4,00  | 0,65 | 2,00  | 5,00  |
| Self-Assessment of style of life       | 3,61  | 4,00  | 0,82 | 1,00  | 5,00  |
| Students life has changed my lifestyle | 3,17  | 3,00  | 0,74 | 1,00  | 4,00  |
| Importance of to be healthy            | 9,16  | 10,00 | 1,29 | 2,00  | 10,00 |

FOREIGNERS

|                                        |       |       |      |       |       |
|----------------------------------------|-------|-------|------|-------|-------|
| Age                                    | 21,69 | 21,00 | 3,48 | 17,00 | 36,00 |
| Material situation                     | 3,15  | 3,00  | 0,55 | 1,00  | 4,00  |
| Self-Assessment of health condition    | 3,67  | 4,00  | 0,80 | 1,00  | 5,00  |
| Self-Assessment of style of life       | 3,55  | 4,00  | 0,88 | 1,00  | 5,00  |
| Students life has changed my lifestyle | 3,45  | 4,00  | 0,69 | 1,00  | 4,00  |
| Importance of to be healthy            | 8,78  | 9,00  | 1,60 | 1,00  | 10,00 |

Correlations

TOTAL

|                                        | SWLS         |                  | PSS-10        |              | FLQ           |                  |
|----------------------------------------|--------------|------------------|---------------|--------------|---------------|------------------|
| Age                                    | -0,045       | 0,349            | 0,080         | 0,093        | -0,007        | 0,881            |
| Material situation                     | <b>0,321</b> | <b>&lt;0,001</b> | -0,061        | 0,202        | <b>0,239</b>  | <b>&lt;0,001</b> |
| Self-Assessment of health condition    | <b>0,376</b> | <b>&lt;0,001</b> | -0,085        | 0,075        | <b>0,404</b>  | <b>&lt;0,001</b> |
| Self-Assessment of style of life       | <b>0,335</b> | <b>&lt;0,001</b> | <b>-0,155</b> | <b>0,001</b> | <b>0,470</b>  | <b>&lt;0,001</b> |
| Students life has changed my lifestyle | 0,015        | 0,753            | <b>0,103</b>  | <b>0,030</b> | <b>-0,107</b> | <b>0,025</b>     |
| Importance of to be healthy            | <b>0,203</b> | <b>&lt;0,001</b> | <b>-0,109</b> | <b>0,023</b> | <b>0,349</b>  | <b>&lt;0,001</b> |

PL

|                                        | SWLS         |                  | PSS-10       |              | FLQ          |                  |
|----------------------------------------|--------------|------------------|--------------|--------------|--------------|------------------|
| Age                                    | -0,067       | 0,329            | 0,130        | 0,059        | 0,025        | 0,714            |
| Material situation                     | <b>0,258</b> | <b>&lt;0,001</b> | -0,002       | 0,979        | 0,041        | 0,548            |
| Self-Assessment of health condition    | <b>0,381</b> | <b>&lt;0,001</b> | -0,109       | 0,113        | <b>0,358</b> | <b>&lt;0,001</b> |
| Self-Assessment of style of life       | <b>0,371</b> | <b>&lt;0,001</b> | -0,111       | 0,107        | <b>0,555</b> | <b>&lt;0,001</b> |
| Students life has changed my lifestyle | 0,043        | 0,534            | <b>0,207</b> | <b>0,002</b> | -0,092       | 0,181            |
| Importance of to be healthy            | <b>0,260</b> | <b>&lt;0,001</b> | -0,116       | 0,091        | <b>0,441</b> | <b>&lt;0,001</b> |

Foreigners

|                                     | SWLS         |                  | PSS-10        |              | FLQ          |                  |
|-------------------------------------|--------------|------------------|---------------|--------------|--------------|------------------|
| Age                                 | -0,022       | 0,738            | 0,030         | 0,653        | -0,067       | 0,318            |
| Material situation                  | <b>0,376</b> | <b>&lt;0,001</b> | <b>-0,149</b> | <b>0,025</b> | <b>0,358</b> | <b>&lt;0,001</b> |
| Self-Assessment of health condition | <b>0,398</b> | <b>&lt;0,001</b> | <b>-0,173</b> | <b>0,009</b> | <b>0,385</b> | <b>&lt;0,001</b> |

|                                        |        |        |        |       |        |        |
|----------------------------------------|--------|--------|--------|-------|--------|--------|
| Self-Assessment of style of life       | 0,310  | <0,001 | -0,204 | 0,002 | 0,408  | <0,001 |
| Students life has changed my lifestyle | -0,013 | 0,844  | 0,130  | 0,049 | -0,048 | 0,473  |
| Importance of to be healthy            | 0,173  | 0,009  | -0,160 | 0,016 | 0,256  | <0,001 |

## ANOVA 2x2

| Dependent variable: Fantastic Life |            |     |            |              |             | Eta         |
|------------------------------------|------------|-----|------------|--------------|-------------|-------------|
| Source                             | SS         | df  | MS         | F            | p           |             |
| Model corrected                    | 868.652    | 3   | 289.551    | 6.901        | .000        | .045        |
| Constant                           | 346779.961 | 1   | 346779.961 | 8265.412     | .000        | .950        |
| Gender                             | 68.570     | 1   | 68.570     | 1.634        | .202        | .004        |
| Nationality                        | 357.454    | 1   | 357.454    | <b>8.520</b> | <b>.004</b> | <b>.019</b> |
| Gender * Nationality               | 13.222     | 1   | 13.222     | .315         | .575        | .001        |
| Błąd                               | 18418.490  | 439 | 41.956     |              |             |             |
| Total                              | 557840.000 | 443 |            |              |             |             |
| Total corrected                    | 19287.142  | 442 |            |              |             |             |

| Dependent variable: SWLS |            |     |            |              |             | Eta         |
|--------------------------|------------|-----|------------|--------------|-------------|-------------|
| Source                   | SS         | df  | MS         | F            | p           |             |
| Model corrected          | 161.972    | 3   | 53.991     | 1.737        | .159        | .012        |
| Constant                 | 167048.506 | 1   | 167048.506 | 5374.475     | .000        | .924        |
| Gender                   | 4.310      | 1   | 4.310      | .139         | .710        | .000        |
| Nationality              | 15.683     | 1   | 15.683     | .505         | .478        | .001        |
| Gender * Nationality     | 150.772    | 1   | 150.772    | <b>4.851</b> | <b>.028</b> | <b>.011</b> |
| Błąd                     | 13644.922  | 439 | 31.082     |              |             |             |
| Total                    | 264578.000 | 443 |            |              |             |             |
| Total corrected          | 13806.894  | 442 |            |              |             |             |

| Dependent variable: PSS-10 |            |     |            |               |              | Eta          |
|----------------------------|------------|-----|------------|---------------|--------------|--------------|
| Source                     | SS         | df  | MS         | F             | p            |              |
| Model corrected            | 839.619    | 3   | 279,873    | 11,219        | 0,000        | 0,071        |
| Constant                   | 132623,012 | 1   | 132623,012 | 5316,486      | 0,000        | 0,924        |
| Gender                     | 79,947     | 1   | 79,947     | <b>3,205</b>  | <b>0,074</b> | <b>0,007</b> |
| Nationality                | 425,046    | 1   | 425,046    | <b>17,039</b> | <b>0,000</b> | <b>0,037</b> |
| Gender * Nationality       | 32,289     | 1   | 32,289     | <b>1,294</b>  | <b>0,256</b> | <b>0,003</b> |
| Błąd                       | 10951,125  | 439 | 24,946     |               |              |              |
| Total                      | 216632,000 | 443 |            |               |              |              |
| Total corrected            | 11790,745  | 442 |            |               |              |              |

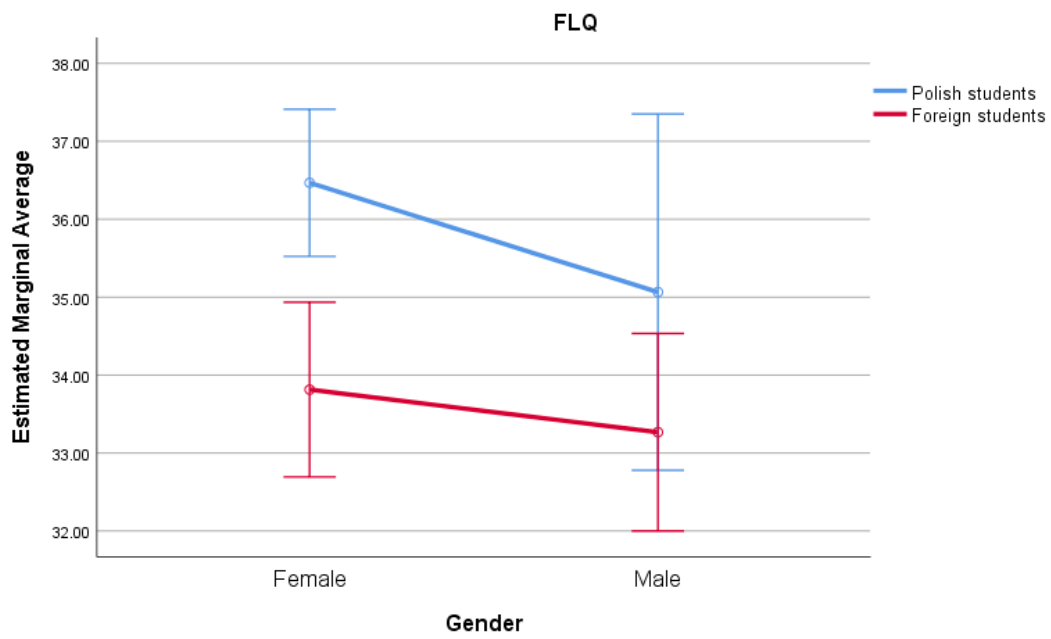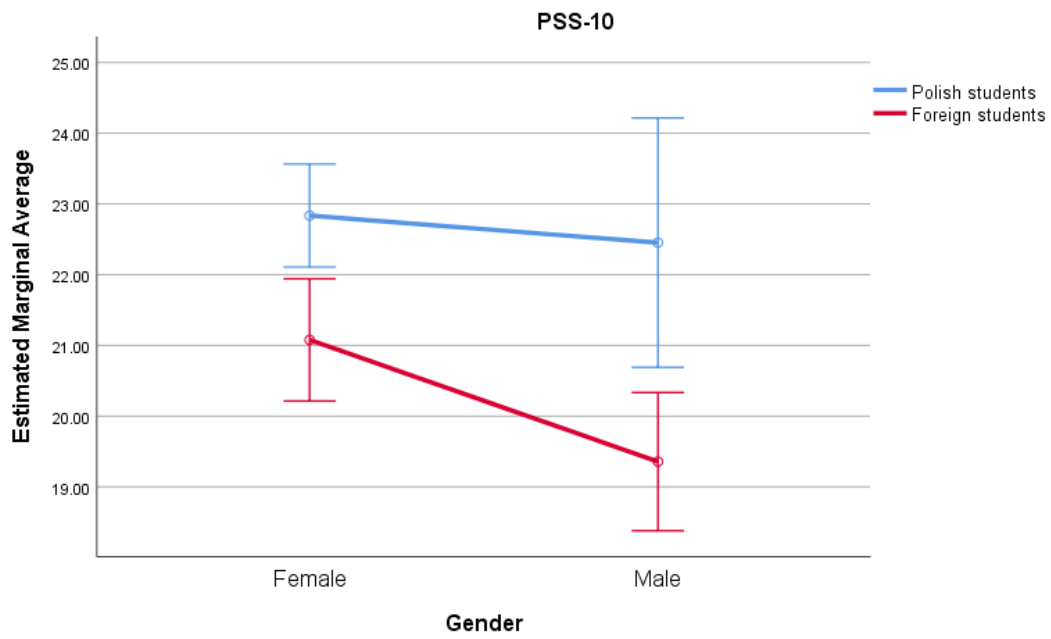

### Multiple comparisons

Dependent variable:

Tukey Test HSD

| (I) VAR00001 |         | Difference of means (I-J) | Standard error | Significance | 95% confidence interval |             |
|--------------|---------|---------------------------|----------------|--------------|-------------------------|-------------|
|              |         |                           |                |              | Lower limit             | upper limit |
| Poland       | Asia    | -0,17662                  | 0,57230        | 0,990        | -1,6525                 | 1,2993      |
|              | America | -0,37705                  | 1,45179        | 0,994        | -4,1210                 | 3,3669      |
|              | Europe  | -0,26577                  | 0,95515        | 0,992        | -2,7290                 | 2,1974      |
| Asia         | Poland  | 0,17662                   | 0,57230        | 0,990        | -1,2993                 | 1,6525      |
|              | America | -0,20043                  | 1,46311        | 0,999        | -3,9736                 | 3,5728      |
|              | Europe  | -0,08915                  | 0,97227        | 1,000        | -2,5965                 | 2,4182      |
| America      | Poland  | 0,37705                   | 1,45179        | 0,994        | -3,3669                 | 4,1210      |
|              | Asia    | 0,20043                   | 1,46311        | 0,999        | -3,5728                 | 3,9736      |
|              | Europe  | 0,11128                   | 1,65090        | 1,000        | -4,1462                 | 4,3688      |
| Europe       | Poland  | 0,26577                   | 0,95515        | 0,992        | -2,1974                 | 2,7290      |
|              | Asia    | 0,08915                   | 0,97227        | 1,000        | -2,4182                 | 2,5965      |
|              | America | -0,11128                  | 1,65090        | 1,000        | -4,3688                 | 4,1462      |

Dependent variable:

Tukey Test HSD

| (I) VAR00001 |         | Difference of means (I-J) | Standard error | Significance | 95% confidence interval |             |
|--------------|---------|---------------------------|----------------|--------------|-------------------------|-------------|
|              |         |                           |                |              | Lower limit             | upper limit |
| Poland       | Asia    | 2.29658*                  | 0,51355        | 0,000        | 0,9722                  | 3,6210      |
|              | America | 2,27934                   | 1,30276        | 0,299        | -1,0803                 | 5,6390      |
|              | Europe  | 3.12081*                  | 0,85710        | 0,002        | 0,9105                  | 5,3312      |
| Asia         | Poland  | -2.29658*                 | 0,51355        | 0,000        | -3,6210                 | -0,9722     |
|              | America | -0,01724                  | 1,31292        | 1,000        | -3,4031                 | 3,3686      |
|              | Europe  | 0,82422                   | 0,87246        | 0,781        | -1,4258                 | 3,0742      |
| America      | Poland  | -2,27934                  | 1,30276        | 0,299        | -5,6390                 | 1,0803      |
|              | Asia    | 0,01724                   | 1,31292        | 1,000        | -3,3686                 | 3,4031      |
|              | Europe  | 0,84146                   | 1,48143        | 0,942        | -2,9790                 | 4,6619      |
| Europe       | Poland  | -3.12081*                 | 0,85710        | 0,002        | -5,3312                 | -0,9105     |
|              | Asia    | -0,82422                  | 0,87246        | 0,781        | -3,0742                 | 1,4258      |
|              | America | -0,84146                  | 1,48143        | 0,942        | -4,6619                 | 2,9790      |

\* The difference of means is significant at the level of 0.05.

Dependent variable:

Tukey Test HSD

| (I) VAR00001 |         | Difference of means (I-J) | Standard error | Significance | 95% confidence interval |             |
|--------------|---------|---------------------------|----------------|--------------|-------------------------|-------------|
|              |         |                           |                |              | Lower limit             | upper limit |
| Poland       | Asia    | 2.55601*                  | 0,66272        | 0,001        | 0,8469                  | 4,2651      |
|              | America | 3,70041                   | 1,68115        | 0,125        | -0,6351                 | 8,0359      |
|              | Europe  | 3.01901*                  | 1,10605        | 0,033        | 0,1666                  | 5,8714      |
| Asia         | Poland  | -2.55601*                 | 0,66272        | 0,001        | -4,2651                 | -0,8469     |
|              | America | 1,14440                   | 1,69427        | 0,906        | -3,2249                 | 5,5137      |
|              | Europe  | 0,46299                   | 1,12588        | 0,977        | -2,4405                 | 3,3665      |
| America      | Poland  | -3,70041                  | 1,68115        | 0,125        | -8,0359                 | 0,6351      |
|              | Asia    | -1,14440                  | 1,69427        | 0,906        | -5,5137                 | 3,2249      |
|              | Europe  | -0,68140                  | 1,91172        | 0,984        | -5,6115                 | 4,2487      |
| Europe       | Poland  | -3.01901*                 | 1,10605        | 0,033        | -5,8714                 | -0,1666     |
|              | Asia    | -0,46299                  | 1,12588        | 0,977        | -3,3665                 | 2,4405      |
|              | America | 0,68140                   | 1,91172        | 0,984        | -4,2487                 | 5,6115      |

\* The difference of means is significant at the level of 0.05.
